1  
2  
3  
4  
5  
6  
7  
8  
9  
10  
11  
12  
13  
14  
15  
16  
17  
18  
19  
20  
21  
22  
23  
24  
25

**An intermittent hypercaloric diet alters gut microbiota, prefrontal cortical gene expression and social behaviours in rats**

Amy C Reichelt <sup>1\*</sup>, Amy Loughman <sup>1,5</sup>, Ashton Bernard <sup>1</sup>, Mukesh Raipuria <sup>1</sup>, Kirsten N Abbott <sup>3</sup>, James Dachtler <sup>4</sup>, Thi Thu Hao Van <sup>2</sup>, Robert J Moore <sup>2</sup>

1. School of Health and Biomedical Science, RMIT University, Bundoora, Victoria, 3083, Australia
2. School of Science, RMIT University, Bundoora, Victoria, 3083, Australia
3. School of Psychology, UNSW Sydney, Kensington, New South Wales, 2052, Australia
4. Department of Psychology, Durham University, South Road, Durham, DH1 3LE, UK
5. School of Medicine, Deakin University, Geelong, Victoria, 3220, Australia

\* Corresponding Author: Dr Amy Reichelt, Robarts Research Institute, Western University, London, ON, Canada, N6A 5B7, amy.reichelt@florey.edu.au

**Running title:** Diet alters social behaviour and gut microbiome

**Key words:** Diet; Social Interaction; Microbiota; Memory; Obesity; Adolescence;

Tables = 3  
Figures = 4  
Supplementary Tables = 3

26 **Abstract**

27 Excessive consumption of high fat and high sugar (HFHS) diets are known to alter reward  
28 processing and aspects of behaviour, and change microbiota profiles. Studies in gnotobiotic  
29 mice also provide evidence that gut microorganisms influence social behaviour. To further  
30 investigate these interactions, the impact of intermittent access to a HFHS diet on social  
31 behaviour, gene expression and microbiota composition was examined. Rats were permitted  
32 intermittent daily access (2h / day) to a palatable HFHS diet for 28 days across the adolescent  
33 period. Social interaction, social memory and novel object recognition were assessed during  
34 this period. Following testing, RT-PCR was conducted on hippocampal and prefrontal cortex  
35 (PFC) samples. 16S ribosomal RNA amplicon sequencing was used for identification and  
36 relative quantification of bacterial taxa. Reduced social interaction behaviours, and impaired  
37 social memory and novel object recognition were observed in HFHS diet rats. Reduced levels  
38 of monoamine oxidase A (Maoa), catechol-O-methyltransferase (Comt) and brain derived  
39 neurotrophic factor (Bdnf) mRNA were observed in the PFC of HFHS diet rats. The relative  
40 abundance of a number of specific taxa differed significantly between the two diet groups, in  
41 particular, *Lachnospiraceae* and *Ruminococcoeae* bacteria, which also predicted social  
42 behaviours, novel object recognition performance and Maoa expression. This is the first  
43 study to show that limited daily access to HFHS diet alters social behaviour and cognition in  
44 rats. Furthermore, behavioural changes are associated with alterations to cortical gene  
45 expression of enzymes involved in monoamine synthesis and neuroplasticity, and microbiota  
46 profiles predicted diet-induced changes to behaviour and gene expression.

47

48

49

50

51

52 **List of abbreviations**

53

54 ACTB - Actin, beta

55 ANOVA – Analysis of variance

56 BDNF – Brain derived neurotrophic factor

57 CD11b - cluster of differentiation molecule 11b

58 Comt - catechol-O-methyltransferase

59 DRD1 - Dopamine receptor D1

60 DRD2 - Dopamine receptor D2

61 FB ratio - *Firmicutes* to *Bacteroidetes* ratio

62 GAD1 - Glutamate decarboxylase 1

63 GF - Germ free

64 gnWAT – Gonadal white adipose tissues

65 HFHS – High fat and high sugar

66 HTR4 - 5-hydroxytryptamine (serotonin) receptor 4, G-coupled

67 IL6 - Interleukin 6

68 ITGAM - Integrin, alpha M

69 PFC – Prefrontal cortex

70 MANOVA - Multivariate analysis of variance

71 MaaO – Monoamine Oxidase

72 mRNA – messenger ribonucleic acid

73 Nlrp3 - NLR family, pyrin domain containing 3

74 OTU - Operational taxonomic units

75 P – Postnatal day

76 PCA - Principle Component Analysis

77 PLS-DA - Partial least-squares discriminant analysis

78 QIIME - Quantitative Insights Into Microbial Ecology

79 rpWAT – Retroperitoneal white adipose tissues

80 Tnf- $\alpha$  - Tumour necrosis factor alpha

81

82

## 83 **1. Introduction**

84 The global rate of obesity is rapidly growing, and the incidence of overweight and obesity is  
85 particularly increasing amongst young people and children (Ogden et al., 2014).  
86 Epidemiological studies indicate that adolescents and young adults most frequently consume  
87 hypercaloric high fat and high sucrose (HFHS) “junk” foods (Braithwaite et al., 2014),  
88 increasing negative health outcome risks.

89

90 Chronic exposure to hypercaloric diets causes multiple changes to behavioural  
91 processes and neuromodulation within the brain, which has been linked to decreased  
92 dopamine turnover in the mesolimbic system (Davis et al., 2008). However, the effects of  
93 chronic HFHS diet consumption may mask critical periods in development whereby  
94 intermittent consumption of this diet leads to lasting biological and behavioural changes in  
95 adulthood. Indeed, emerging data suggests that adolescence may be a sensitive period for  
96 susceptibility to diet-induced behavioural changes in mood (Baker et al., 2017), reward  
97 seeking (Naneix et al., 2017; Reichelt, 2016) and cognition (Labouesse et al., 2017).

98

99 Beyond a role in cognition, recent studies have suggested links to obesity,  
100 hypercaloric diet consumption and changes in social behaviour in rodents (Carvalho et al.,  
101 2016; Teixeira et al., 2017; Yaseen et al., 2018). High fat diet consumption increased social  
102 interaction in adult male mice, but impaired recognition memory of a novel mouse (Takase et  
103 al., 2016), and social recognition has also been recently shown to be altered in juvenile rats  
104 following short term exposure to high fat diets (Yaseen et al., 2018). Social play is a  
105 characteristic adolescent social behaviour that decreases into adulthood (Trezza et al., 2010).  
106 Social play was reduced following neonatal overfeeding, suggesting that nutrition may

107 impact the expression of this behaviour (Carvalho et al., 2016); however litter size  
108 manipulations may contribute to altered social repertoires.

109

110         There are links between the brain regions that support social behaviour and those that  
111 are altered by HFHS diet. The prefrontal cortex (PFC) matures across adolescence (Spear,  
112 2000) and represents a critical period of vulnerability to diet evoked cognitive deficits (Baker  
113 et al., 2017; Reichelt and Rank, 2017). The PFC has an important role in social processing  
114 (Bicks et al., 2015; Kolb, 1974), and appropriate maturation is fundamental for the  
115 development of social cognition (Kim et al., 2015). Experimental evidence highlights that the  
116 rodent homologue of the medial PFC and the hippocampus are important for social  
117 behaviour, including social memory and sociability (Kogan et al., 2000; Okuyama et al.,  
118 2016; Rudebeck et al., 2007). Aspects of social interaction are rewarding (Trezza et al.,  
119 2010), and the increased dopamine neurotransmission and refinement of reward-associated  
120 neural connections within the PFC across adolescence is proposed to invigorate this  
121 behaviour.

122

123         Moreover, previous observations noted that intermittent access to a HFHS diet (Baker  
124 and Reichelt, 2016), or high fat diet (Labouesse et al., 2017) across adolescence evoked PFC  
125 dysregulation, complementing research demonstrating that PFC excitation/inhibitory  
126 imbalance underpins social deficits (Selimbeyoglu et al., 2017), thus providing rationale for  
127 exploring the impact of an intermittent HFHS diet on social behaviours. Restricted access to  
128 palatable foods has been shown to impact on reward neurocircuitry (Bocarsly et al., 2014;  
129 Furlong et al., 2014), and furthermore allows behavioural examination both immediately  
130 following palatable food consumption and when animals have not had access to palatable  
131 foods.

132

133           Diet influences the gut microbial composition (Albenberg and Wu, 2014) and  
134 alterations to gut flora has been linked to changes in cognition, mood and behaviour  
135 (Desbonnet et al., 2015; Frohlich et al., 2016). Studies utilising germ-free (GF) mice  
136 demonstrate that the presence, composition, and functionality of the gut microbiota is crucial  
137 for normal social behaviours, which are reduced in GF mice (Desbonnet et al., 2015).  
138 Moreover, GF mice and antibiotic-induced gut dysbiosis rodent models have demonstrated  
139 associations between disruption of the gut microbial community and cognitive, social and  
140 emotional alterations (Desbonnet et al., 2015; Frohlich et al., 2016).

141

142           To further the evidence that intermittent exposure to a HFHS diet during the juvenile  
143 developmental phase alters cognitive control and neurotransmitter systems within the brain,  
144 we examined the effects of intermittent HFHS food consumption on social interaction and  
145 social memory in young rats. We highlight putative molecular pathways by examination of  
146 the expression of genes associated with neuroplasticity, monoamine signalling, and  
147 neuroinflammation in the PFC and hippocampus, and faecal microbiota composition to  
148 explore diet-induced alterations. Spontaneous novel object recognition and odour recognition  
149 memory were examined to assess HFHS diet effects on memory and olfaction. Exploratory  
150 analyses through linear modelling were performed to determine associations between faecal  
151 microbiota composition, behaviour and cortical gene expression.

152

## 153 **2. Methods**

### 154 *2.1. Animals*

155           Male ( $n=32$ ) albino Sprague Dawley rats (Animal Resources Centre, Western  
156 Australia) arrived at postnatal day (P)21 (~50g) and were housed in groups of four in climate

157 (21°C ± 2°C; humidity 55 ± 5%) and light (12 h cycle lights on at 07:00h) controlled colony  
158 room. Standard laboratory rat chow (Meat Free Rat and Mouse Diet, Specialty Feeds,  
159 Western Australia; energy composition of 14 KJ/g, 23% protein, 12% fat, 65%  
160 carbohydrates) and water was available *ad libitum* throughout the experiment. Behavioural  
161 tests were performed between 08:00 and 14:00h and procedures were approved by the  
162 Animal Care and Ethics Committee at RMIT University.

163

## 164 2.2. Diet administration

165 Rats were allocated to diet conditions: Control (chow fed,  $n=8$ ) or HFHS condition  
166 ( $n=8$ ), or were allocated as age/weight matched sample for social memory and social  
167 interaction ( $n=16$ ). Body weights were standardized in all treatment groups prior to the  
168 commencement of the diet (Control:  $75.5 \pm 2.0$ g; HFHS:  $76.4 \pm 2.0$  g), and rats were handled  
169 for 7 days prior to manipulations. Group-housing was used to negate social isolation stress  
170 (Skelly et al., 2015). Rats in the HFHS diet condition were provided with 2 h daily homecage  
171 access (between 09:00-11:00h) to semi-pure HFHS pellets (Specialty Feeds, Western  
172 Australia, SP04-025; 18.4kJ/g digestible energy; composed of 20% fat (lard), 39.6% sucrose,  
173 19.4% protein, providing 36% energy from lipids and 55% from sucrose), in addition to *ad*  
174 *libitum* chow (Specialty Feeds, Western Australia, Meat Free Rat and Mouse Diet, energy  
175 composition of 14 KJ/g, 23% protein, 12% fat, 65% carbohydrates) and water access.  
176 Consumption of HFHS diet was calculated from the weight (g) between the HFHS pellets  
177 allocated and that collected after 2 h access per cage. Body weight was recorded at baseline  
178 before the diet began, and thereafter twice per week. Chow consumption over a 24 h period  
179 was measured twice per week in conjunction with HFHS pellet intake to calculate total  
180 energy intake per cage of four rats (Del Rio et al., 2016).

181

## 182        **2.3. Behavioural analysis**

183            A timeline of the general experimental procedures is illustrated in Figure 1A. Diet  
184        administration began on P28, coinciding with definitions of adolescence in male rats (Spear,  
185        2000). Behavioural tests were conducted in a room illuminated to 30 lux, rats were assessed  
186        for social interaction, social memory, social odour preference, novel object recognition and  
187        odour recognition memory. All behavioural data were scored by an observer who was blind  
188        to the group allocations using ODLog (version 2.7, Macropod Software, Australia).

189

### 190            2.3.1. *Social interaction*

191        Social interaction tests were conducted in a square test arena (dimensions: 50 cm [length] x  
192        50 cm [width] x 60 cm [height]) constructed from black Perspex. A camera mounted above  
193        the test area recorded all the social interaction tests to a computer for subsequent scoring. All  
194        rats were habituated to the arena 24 h prior to testing by being placed individually into the  
195        arena for 10 minutes.

196            Prior to social interaction testing, rats were isolated from their cage mates in individual  
197        holding cages for 15 minutes. In the social interaction test, one rat from either the control or  
198        HFHS diet condition rat was placed in the arena with an unfamiliar partner matched for body  
199        weight (+/- 10g). Test sessions were 10 min duration. To differentiate between animals, one  
200        rat was marked on its back with a black odourless fabric pen marker 24 h prior to testing.  
201        The two rats were placed into the test arena simultaneously so that they were facing each  
202        other in opposing corners. Rats in the HFHS diet condition were tested 1 h after access to the  
203        HFHS pellets “post”, and 23 h after HFHS pellet access “pre”, counterbalanced across days  
204        and animals. Between tests the arena was cleaned with 70% ethanol to eliminate odour cues.

205            As social behaviour in rats has been shown to depend on the playfulness of its partner,  
206        both animals in a sample pair were considered as one experimental unit (Trezza et al., 2010).



207 Pinning and pouncing frequencies were quantified and considered the most characteristic  
208 parameters of social play behaviour in rats. Social play behaviours usually occur very rapidly  
209 and they are of short duration thus, individual frequency was scored. Videos were scored to  
210 measure i) the total time (sec) spent in social interaction, ii) frequency of social investigation  
211 behaviour (sniffing, licking, grooming), iii) frequency of social play behaviour (pinning,  
212 pouncing), iv) frequency of aggressive-like behaviour (rump biting, boxing, overt physical  
213 harm).

214

### 215 2.3.2. *Social memory*

216 Social memory was tested in two phases (see Fig 1D). As HFHS rats showed differences in  
217 social interaction pre HFHS food consumption, social memory testing and other behavioural  
218 tests were conducted after HFHS access to ensure that any memory deficits observed were  
219 not due to reduced social contact in the HFHS diet rats. Social memory tests were conducted  
220 in a circular arena (dimensions: 100 cm diameter, 50 cm high) constructed from grey  
221 Perspex. The arena contained two wire chambers with plastic bases (dimensions: 18 cm  
222 [length] x 20 cm [width] x 22 cm [height]). The wires were interspaced 1cm apart which  
223 allows the test rats to interact with the novel sample rats but not physically contact them. A  
224 camera mounted above the test area recorded the tests as described above. Control and HFHS  
225 diet rats were habituated to the testing apparatus 24 h prior to testing by being placed  
226 individually into the arena with the empty chambers for 10 minutes. Sample rats were also  
227 habituated to the individual chambers for 10 minutes 24 h prior to testing.

228 Social memory was tested in two phases. In Phase 1, rats were placed in the arena for  
229 5 min with one sample rat in a chamber and the other chamber empty. Time exploring the  
230 chamber containing the sample rat versus the empty chamber was considered a measure of  
231 sociability (Crawley et al., 2007). The experimental rat was then removed and placed into

232 individual holding cages for a 5 min inter-trial interval (ITI) period. In Phase 2, the arena  
233 contained the original sample rat (familiar) in a chamber and the previously empty chamber  
234 contained a novel rat. The experimental rat was returned to the arena to explore for a 3 min  
235 period. Between test phases the arena was cleaned with 70% ethanol to eliminate odour cues.  
236 Videos were scored to measure the duration of time the rat spent exploring the chambers  
237 during each phase. Sociability was quantified as the time spent exploring the chamber  
238 containing the sample rat as opposed to the empty chamber, and social recognition memory  
239 was measured as the time spent in proximity to the chamber containing the novel rat versus  
240 the familiar sample rat.

241

#### 242 *2.3.3. Social odour preference*

243 The chambers used for social recognition were filled with soiled bedding from a cage of  
244 young male rats (approximately 5 weeks of age) housed in an adjacent holding room, or clean  
245 bedding. Rats were allowed to freely explore the arena for 5 min and the amount of time  
246 spent exploring empty chambers containing either soiled or clean bedding was recorded.

247

#### 248 *2.3.4. Odour memory*

249 Odour memory was conducted in the square test arena (as described in 2.3.1). Identical  
250 cylindrical stainless steel containers (10cm [height] x 6cm [width]) with perforated stainless  
251 steel lids were filled with corncob bedding and then scented with 3 ml of peppermint or  
252 almond extract (Queen, Australia) to serve as odour stimuli (see Fig 1E). The odour memory  
253 test consisted of 2 phases – sample and test. Pilot testing determined that these odours were  
254 equally explored by the rats. During the sample phase two of the same scented containers  
255 were placed in opposite corners of the arena. The rat was allowed to freely explore the arena  
256 for 5 min. The rat was then removed from the arena and placed in a holding cage for a 5 min

257 retention period. The arena was thoroughly cleaned with 70% ethanol and one of the scented  
258 containers was replaced with an identical container filled with a novel odour. The rat was  
259 then returned to the arena for a 3 min test phase. The duration of time the rat spent exploring  
260 each of the odour containers during each phase was measured.

261

#### 262 *2.3.5. Object recognition memory*

263 Object recognition (Fig 1F) was conducted in the square test arena (as described in 2.3.1).  
264 Commercial objects (e.g. plastic bottles and tin cans) were used with differing heights (16-  
265 24cm) and widths (7-14cm). Rats explored two identical sample objects in the arena (sample  
266 phase; 5 minutes). The following day, 24 h after the sample phase, rats were tested for  
267 recognition of a familiar versus a novel object (test phase; 3 mins). The duration of time the  
268 rat spent exploring each object during each phase was measured.

269

#### 270 *2.4. Sample collection*

271 Rats were anaesthetised (sodium pentobarbital 100 mg/kg, intraperitoneal), brains  
272 removed and the PFC and hippocampus (composed of dorsal and ventral poles) dissected and  
273 snap frozen in liquid nitrogen and stored at -80°C for analysis by RT-PCR. Retroperitoneal  
274 and gonadal white adipose tissues (rpWAT; gnWAT) and liver were dissected and weighed.  
275 Livers were visually scored for markers of hepatic steatosis based on previous criteria  
276 (Velkoska et al., 2010). One faecal bolus was collected from the terminal caecum, snap  
277 frozen and stored at -80°C prior to microbiota analysis.

278

#### 279 *2.5. Quantitative RT-PCR*

280 RNA was extracted using Tri-Reagent (Sigma-Aldrich) and RNeasy Mini kit (Qiagen), and  
281 quantity and purity of RNA determined by nanodrop. RNA was converted to cDNA (RT<sup>2</sup>  
282 First Strand Kit Qiagen). Gene expression was quantified by Custom RT<sup>2</sup> Profiler PCR  
283 Arrays (Qiagen) with RT<sup>2</sup> SYBR Green Mastermix (Qiagen, Australia), real-time PCR was  
284 then performed using a QuantStudio™ 7 Flex Real-Time PCR System (Applied  
285 Biosystems). Genes of interest were NLR family, pyrin domain containing 3 (Nlrp3),  
286 Glutamate decarboxylase 1 (Gad1), Brain-derived neurotrophic factor (Bdnf), Dopamine  
287 receptor D1 (Drd1), Dopamine receptor D2 (Drd2), Monoamine oxidase A (Maoa), Catechol-  
288 O-methyltransferase (Comt), 5-hydroxytryptamine (serotonin) receptor 4, G-coupled (Htr4),  
289 Tumour necrosis factor alpha (Tnf- $\alpha$ ), Interleukin 6 (Il6), Integrin, alpha M (Itgam) and  
290 Actin, beta (Actb) from Qiagen (See Supplementary Table 1 for reference sequences).  
291 Analysis of relative gene expression was normalized to the housekeeping gene beta actin, via  
292 the  $\Delta\Delta C_T$  method (Livak and Schmittgen, 2001).

293

#### 294 *2.6. 16S rRNA gene amplicon sequencing and bioinformatics*

295 Total DNA was isolated using the Bioline ISOLATE Faecal DNA Kit (Bioline). PCR  
296 was performed using Q5 DNA polymerase (New England Biolabs) with a primer set selected  
297 to amplify V3-V4 region of 16S rRNA gene (forward: ACTCCTACGGGAGGCAGCAG and  
298 reverse: GGACTACHVGGGTWTCTAAT). Sequencing was performed on an Illumina  
299 MiSeq instrument (2 x 300bp paired-end sequencing), following the method detailed by  
300 Fadrosch et al. (2014). Sequences were joined in Quantitative Insights Into Microbial Ecology  
301 (QIIME) 1.9.1 (<http://qiime.org>) using the fastq-join method. Maximum allowed percent  
302 differences within the overlapping region was zero. Sequences were de-multiplexed using the  
303 QIIME split library protocol, keeping only sequences with Phred quality score higher than  
304 20. The dataset was inspected for chimeric sequences using Pintail (Ashelford et al., 2005).

305 Operational taxonomic units (OTUs) were clustered at 97% sequence identity using  
306 UCLUST (Edgar, 2010). Taxonomic assignments were performed against the GreenGenes  
307 database (DeSantis et al., 2006). OTUs with a relative abundance of less than 0.01% were  
308 removed.

309

## 310 **2.7. Statistical analyses**

### 311 *2.7.1. Behaviour, physiological parameters and brain mRNA expression*

312 Results were analysed using repeat measures analysis of variance (ANOVA - body  
313 weight and energy intake), mixed design ANOVAs (social recognition memory, social  
314 interaction, sociability, novel odour recognition and novel object recognition), one-way  
315 ANOVA (rpWAT, gnWAT, liver weight, RT-PCR values) with post-hoc Tukey and equality  
316 of error variance assessed, or multivariate linear models following significant correlations  
317 with post-hoc tests.  $\Delta\Delta C_T$  values that exceeded  $\pm 2$  standard deviations from the mean were  
318 excluded from analysis, resulting in group sizes of 6-8 per gene.

319 Social recognition memory and novel object recognition performance were converted  
320 to Exploration Ratios [Ratio = Time(novel-familiar) / Time(novel+familiar)] to permit  
321 bivariate analysis using correlations (Pearson's R, 1-tail) to examine associations between  
322 mRNA expression and behaviours found to differ between diet groups. Liver scores were  
323 analysed using the Kruskal-Wallis test. Data were analysed with IBM SPSS Statistics 24,  
324 GraphPad Prism 7 and R.

325

### 326 *2.7.2. Microbiota*

327 Visualisation, alpha diversity and distance measures of microbiota were conducted  
328 using the R packages *phyloseq* and *MixOmics*. Data were total-sum scaled (i.e. relative  
329 abundance of operational taxonomic units – OTUs) and centre-log ratio transformed where

330 appropriate. The *DESeq2* package was used to undertake differential abundance testing (Love  
331 et al., 2014), and multivariate analysis of variance (MANOVA) was used to test associations  
332 between *Firmicutes* to *Bacteroidetes* (FB) ratio, behaviour and gene expression.

333 Significance for differential abundance analyses was assessed on the basis of a  
334 threshold q-value of 0.05 (i.e. p-value adjusted using the False Discovery Rate approach;  
335 Benjamini et al. (2001)). Bivariate correlations were calculated using Pearson's R, 2-tailed.

### 336 337 **3. Results**

#### 338 *3.1. Body Weight, energy consumption and physiological measurements*

339 All rats gained weight across the experiment, however HFHS diet rats gained more  
340 weight than controls (Fig 1B, time x diet group  $F(8,112)=5.07$ ,  $P<0.001$ ). Overall, rats  
341 consumed increasing amounts of energy across the 4 week period ( $F(3,18)=81.4$ ,  $P<0.001$ ),  
342 and HFHS diet rats consumed more energy than control rats (Fig 1C, diet group x time  
343  $F(1,6)=10.8$ ,  $P<0.001$ ). At the experimental end point, HFHS diet rats were heavier than  
344 chow fed animals ( $F(1,14)=4.516$ ,  $P=0.05$ ), had greater rpWAT ( $F(1,14)=5.54$ ,  $P=0.034$ ),  
345 gnWAT ( $F(1,14)=4.71$ ,  $P=0.048$ ), and increased liver scores ( $U=5$ ,  $P<0.01$ ) (Supplementary  
346 Table 2).

347



354 memory or behavioural deficits observed were not due to reduced social contact in the HFHS  
355 diet rats. B) Mean body weights of control and HFHS rats across the 4-week diet exposure  
356 period. C) Mean energy consumption (kJ) per cage of rats across the 4-week diet exposure  
357 period. D) Schematic of social memory testing procedure. E) Schematic of novel odour  
358 recognition procedure, where A and B are different odours contained in identical containers.  
359 F) Schematic of novel object recognition procedure. Error bars represent +SEM. \* indicates  
360  $P \leq 0.05$ , \*\*  $P < 0.01$ , \*\*\*  $P < 0.001$ .

361

### 362 *3.2. Effect of HFHS diet on social interaction*

363 To assess the effect of what and when HFHS diet consumption has upon social  
364 behaviour, we tested the total social exploration time one hour prior (“pre”) or one hour  
365 following (“post”) HFHS food access. Social interaction duration did not differ in the control  
366 (normal chow fed) animals. However, HFHS diet rats spent less time engaged in social  
367 interaction “pre” HFHS food access, compared to “post” HFHS food access (diet access x  
368 diet group  $F(1,14)=5.66$ ,  $P < 0.05$ , effect of diet group “pre”  $F(1,14)=9.271$ ,  $P < 0.01$ , but not  
369 “post”  $F < 1$ , Fig 2A). The microstructure of social behaviour was also examined. Social  
370 investigation frequency was increased in the HFHS rats post-consumption (diet access x diet  
371 group  $F(1,14) = 8.6$ ,  $P < 0.05$ ; HFHS  $F(1,14)=21.59$ ,  $P < 0.001$ , control  $F < 1$ , Fig 2B). No  
372 differences were observed in the frequency of social play behaviours (Fig 2C), and  
373 aggressive behaviours were not observed. Together, this data suggests that for those rats on  
374 the intermittent HFHS diet, social motivation is decreased the longer the period is since diet  
375 consumption.

376

### 377 *3.3. Effect of HFHS diets on social recognition memory*



378 Mouse social behaviour has been typically examined using the ‘three-chamber’ social  
379 approach test. We adapted this protocol for use in rats to assay whether changes in social  
380 recognition memory could be altered by HFHS diet. During the social approach phase of the  
381 sociability test (Fig 2D), both control and HFHS rats preferentially explored the novel rat,  
382 “sample”, compared to the empty cage ( $F(1,14)=275.5$ ,  $P<0.001$ ), no significant between  
383 group or interaction effect,  $F_s<1$ ). However, HFHS rats showed impaired social recognition,  
384 exploring the familiar and novel rat equally, contrasting to the strong preference of control  
385 rats to explore the novel rat (chamber x diet group  $F(1,14)=39.15$ ,  $P<0.001$ , control  
386  $F(1,14)=109.3$ ,  $P<0.001$ , HFHS  $F(1,14)=2.6$ ,  $P=0.13$ , Fig 2E). Exploration ratios calculated  
387 from the test data [Mean (SEM): Control = 0.80 (0.03); HFHS = 0.56 (0.03)] differed  
388 significantly between groups ( $F(1,14)=33.2$ ,  $P<0.001$ ).

389

#### 390 *3.4. No effect of diet on social odour preference or odour recognition memory*

391 To confirm that the lack of social recognition memory in the HFHS rats was not due  
392 to a lack of olfactory sensitivity, we tested their ability to discriminate between clean and  
393 soiled bedding and between two non-social odours. Control and HFHS diet rats preferentially  
394 explored the chamber containing a social odour ( $F(1,14)=217.8$ ,  $P<0.001$ , Fig 2F). During  
395 odour recognition testing, control and HFHS diet rats preferentially explored the novel odour  
396 container, demonstrating odour recognition memory (odour x diet group  $F(1,14)=3.0$ ,  
397  $P=0.105$ , Fig 2G). Together, HFHS rats were unimpaired in odour discrimination, suggesting  
398 that the social recognition deficit cannot be explained by a lack of sensitivity to social  
399 olfactory cues.

400

#### 401 *3.5. Effects of HFHS diet on novel object recognition*

402 To confirm a role in cognition, we tested HFHS diet rats on their ability to explore  
403 novel compared to previously explored objects. Control rats showed intact object recognition  
404 memory by preferentially exploring the novel object; however, HFHS rats explored the  
405 familiar and novel objects equally, indicating impaired object recognition (object x diet  
406 group,  $F(1,14)=50.7$ ,  $P<0.001$ ; control  $F(1,14)=120.5$ ,  $P<0.001$ , HFHS  $F<1$ , Fig 2H).  
407 Exploration ratios calculated from the test data [Mean (SEM): Control = 0.73 (0.01); HFHS =  
408 0.52 (0.02)] differed significantly between groups ( $F(1,14)=60.8$ ,  $P<0.001$ ).  
409

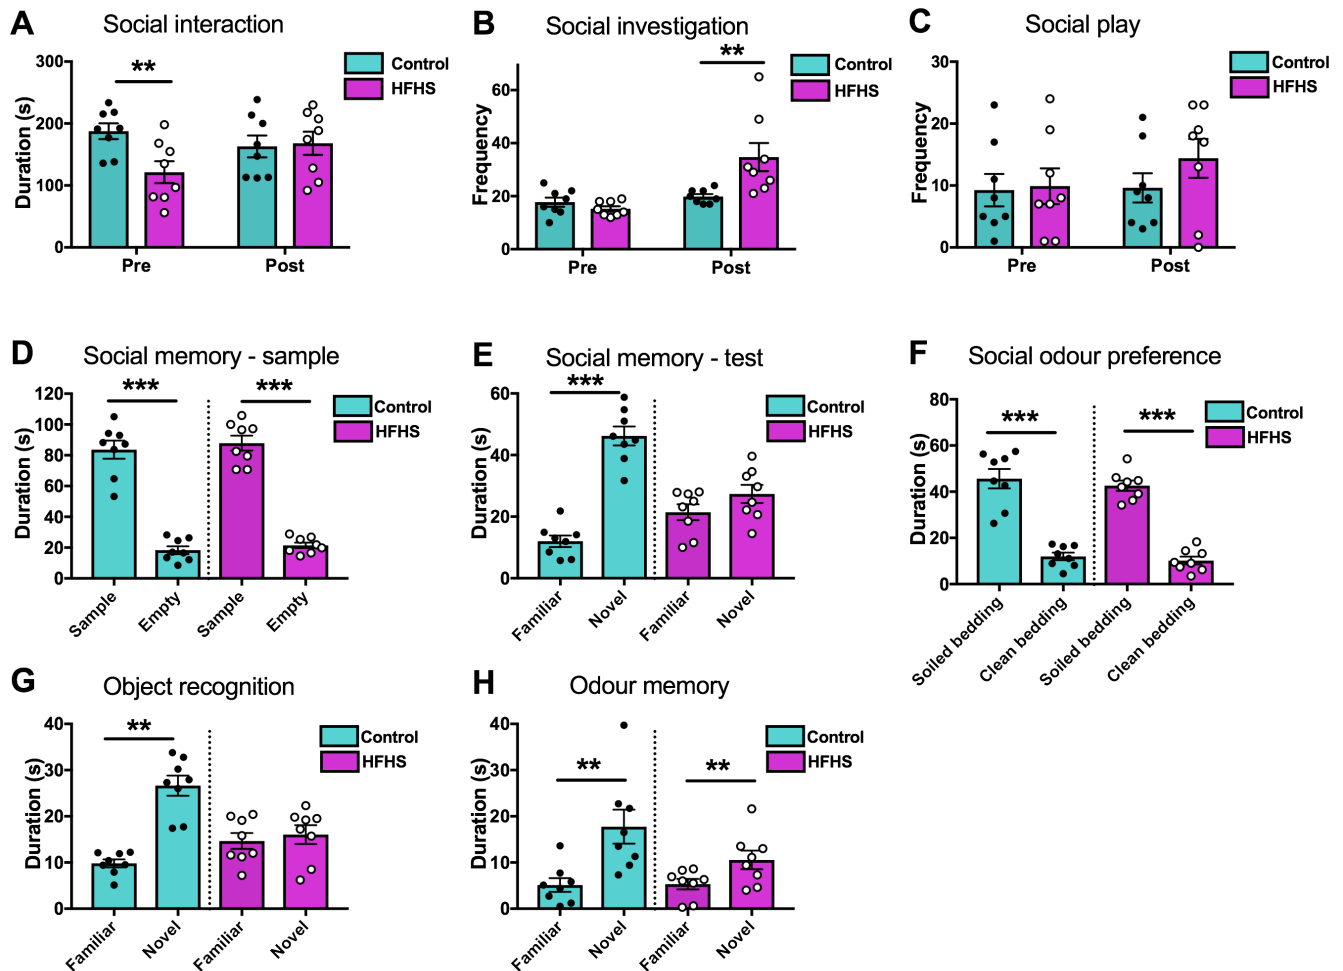

410  
411 **Figure 2.** Social behaviours between control / HFHS diet exposed rats and a novel weight /  
412 age matched conspecific. HFHS diet rats were tested either 23h after HFHS pellet access  
413 “pre” or 1h after access to the HFHS pellets “post”, A) Total duration of social contact

414 between rats, B) frequency of social interactions, and C) frequency of social play.  
415 Performance of HFHS diet and control rats in social recognition memory - D) exploration  
416 times of the chamber containing the sample rat “sample” and empty chamber “empty” during  
417 the sample phase of social memory testing, E) exploration times of the chamber containing  
418 the familiar sample rat and chamber containing a novel sample rat. F) Exploration time of  
419 chambers containing soiled bedding “social odour” or clean bedding. G) Novel odour  
420 recognition performance in control and HFHS diet rats during the test phase following a 5  
421 min delay. H) Novel object recognition performance during the test phase following a 24h  
422 delay. Error bars represent +SEM. \*\*  $P<0.01$ . Error bars represent +SEM. \* indicates  
423  $P\leq 0.05$ , \*\*  $P<0.01$ , \*\*\*  $P<0.001$  between groups comparisons.

424

### 425 3.6. Diet effects on PFC and hippocampal mRNA expression

426 To determine the whether short, intermittent periods of exposure to HFHS diet  
427 changed transcript expression within two brain regions associated with social behaviour, we  
428 quantified mRNA expression of genes related neuroplasticity, dopamine and monoamine  
429 signalling and inflammation (Table 1). We found the majority of transcript changes occurred  
430 in the prefrontal cortex. Consumption of the HFHS diet correlated with reduced expression of  
431 genes encoding enzymes involved in monoamine degradation, Comt and Maa. The HFHS  
432 diet fed rats had reduced Maa expression in the PFC ( $F(1,13)=8.50$ ,  $P<0.05$ ) and  
433 hippocampus ( $F(1,14)=6.89$ ,  $P<0.05$ ); Comt expression was reduced in the PFC  
434 ( $F(1,14)=19.0$ ,  $P<0.001$ ), but not the hippocampus. The neuroplasticity associated gene Bdnf  
435 was reduced in the PFC of HFHS consuming rats ( $F(1,13)=4.99$ ,  $P<0.05$ ). Group differences  
436 in PFC expression of the neuroinflammatory genes Nlrp3 ( $F(1,14)=4.41$ ,  $P=0.056$ ) and Il6  
437 ( $F(1,14)=4.24$ ,  $P=0.06$ ) trended towards significance (Table 1).

438 **Table 1:** The effects of intermittent high fat and high sucrose (HFHS) diet exposure on  
 439 prefrontal cortex and hippocampal gene expression. Table shows Mean (SEM), \* =  $P < 0.05$ ,  
 440 \*\* =  $P < 0.01$ , # =  $P < 0.10$

| Gene                       | Prefrontal cortex |               |                 | Hippocampus |              |                 |
|----------------------------|-------------------|---------------|-----------------|-------------|--------------|-----------------|
|                            | Control           | HFHS          | <i>p</i> -value | Control     | HFHS         | <i>p</i> -value |
| <b>Neuroplasticity</b>     |                   |               |                 |             |              |                 |
| Gad1                       | 0.84 (0.04)       | 0.94 (0.07)   | <i>n.s.</i>     | 1.00 (0.08) | 0.94 (0.06)  | <i>n.s.</i>     |
| Bdnf                       | 1.00 (0.10)       | 0.72 (0.03)*  | 0.045           | 1.00 (0.08) | 0.96 (0.17)  | <i>n.s.</i>     |
| <b>Dopamine receptors</b>  |                   |               |                 |             |              |                 |
| Drd1a                      | 1.00 (0.23)       | 0.65 (0.13)   | <i>n.s.</i>     | 1.00 (0.11) | 0.95 (0.09)  | <i>n.s.</i>     |
| Drd2                       | 1.00 (0.32)       | 0.56 (0.15)   | <i>n.s.</i>     | 0.93 (0.03) | 0.85 (0.07)  | <i>n.s.</i>     |
| <b>Monoamine synthesis</b> |                   |               |                 |             |              |                 |
| Maoa                       | 1.00 (0.04)       | 0.86 (0.02)*  | 0.012           | 1.00 (0.04) | 0.83 (0.05)* | 0.02            |
| Comt                       | 1.00 (0.02)       | 0.83 (0.03)** | 0.001           | 1.00 (0.07) | 1.08 (0.09)  | <i>n.s.</i>     |
| <b>Serotonin receptor</b>  |                   |               |                 |             |              |                 |
| Htr4                       | 0.85 (0.07)       | 0.79 (0.08)   | <i>n.s.</i>     | 1.00 (0.05) | 0.96 (0.04)  | <i>n.s.</i>     |
| <b>Inflammation</b>        |                   |               |                 |             |              |                 |
| Tnf- $\alpha$              | 1.00 (0.16)       | 0.79 (0.11)   | <i>n.s.</i>     | 1.00 (0.21) | 0.65 (0.06)  | <i>n.s.</i>     |
| Il6                        | 1.00 (0.15)       | 0.62 (0.08)#  | 0.060           | 0.81 (0.14) | 0.59 (0.11)  | <i>n.s.</i>     |
| Nlrp3                      | 1.00 (0.06)       | 0.85 (0.03)#  | 0.056           | 1.00 (0.18) | 1.03 (0.14)  | <i>n.s.</i>     |
| Itgam                      | 1.00 (0.10)       | 1.09 (0.09)   | <i>n.s.</i>     | 1.00 (0.11) | 1.23 (0.19)  | <i>n.s.</i>     |

441

### 442 3.7. Microbiota composition and analysis

443 The relative abundance of a number of specific taxa differed significantly between the  
 444 two diet groups as shown by DESeq2 analysis (Fig 3A, Supplementary Table 3). HFHS diet  
 445 increased bacteria from *Firmicutes* phylum *Clostridiales* family, including *Lachnospiraceae*

446 (Genus *Blauta*,  $q < 0.04$ ; Genus Unspecified  $q < 0.03$ ), *Ruminococaceae* (Genus Unspecified  
447  $q < 0.01$ ) and *Veillonellaceae* (Genus *Phascolarctobacterium*  $q < 0.02$ ). HFHS diet increased  
448 bacteria from *Actinobacteria* phylum, family *Bifidobacteriaceae* (Genus *Bifidobacterium*  
449  $q < 0.04$ ), *Bacteroidetes* phylum, order *Bacteroidales* (Genus Unspecified  $q < 0.05$ ) and  
450 *Tenericutes* phylum, order *Erysipelotrichaceae* (Genus *Allobaculum*  $q < 0.05$ ).

451

452           Unsupervised principle component analysis (PCA) revealed overlap between groups,  
453 the first component explained 22% of variance; the second component 11% (Fig 3B). Partial  
454 least squares discriminant analysis (PLS-DA) identified the two components that discriminate  
455 maximally between the HFHS and control diet groups, showing a large proportion of  
456 variance accounted for by the first component (21%) and a lesser degree by the second (8%),  
457 this demonstrated significant separation of the microbiota community structure between the  
458 groups (Fig 3C). Alpha diversity did not differ between the HFHS and control groups  
459 measured by observed species, Chao 1, Shannon or Simpson indices (see Fig 3D;  $F_s < 1$ ).

460

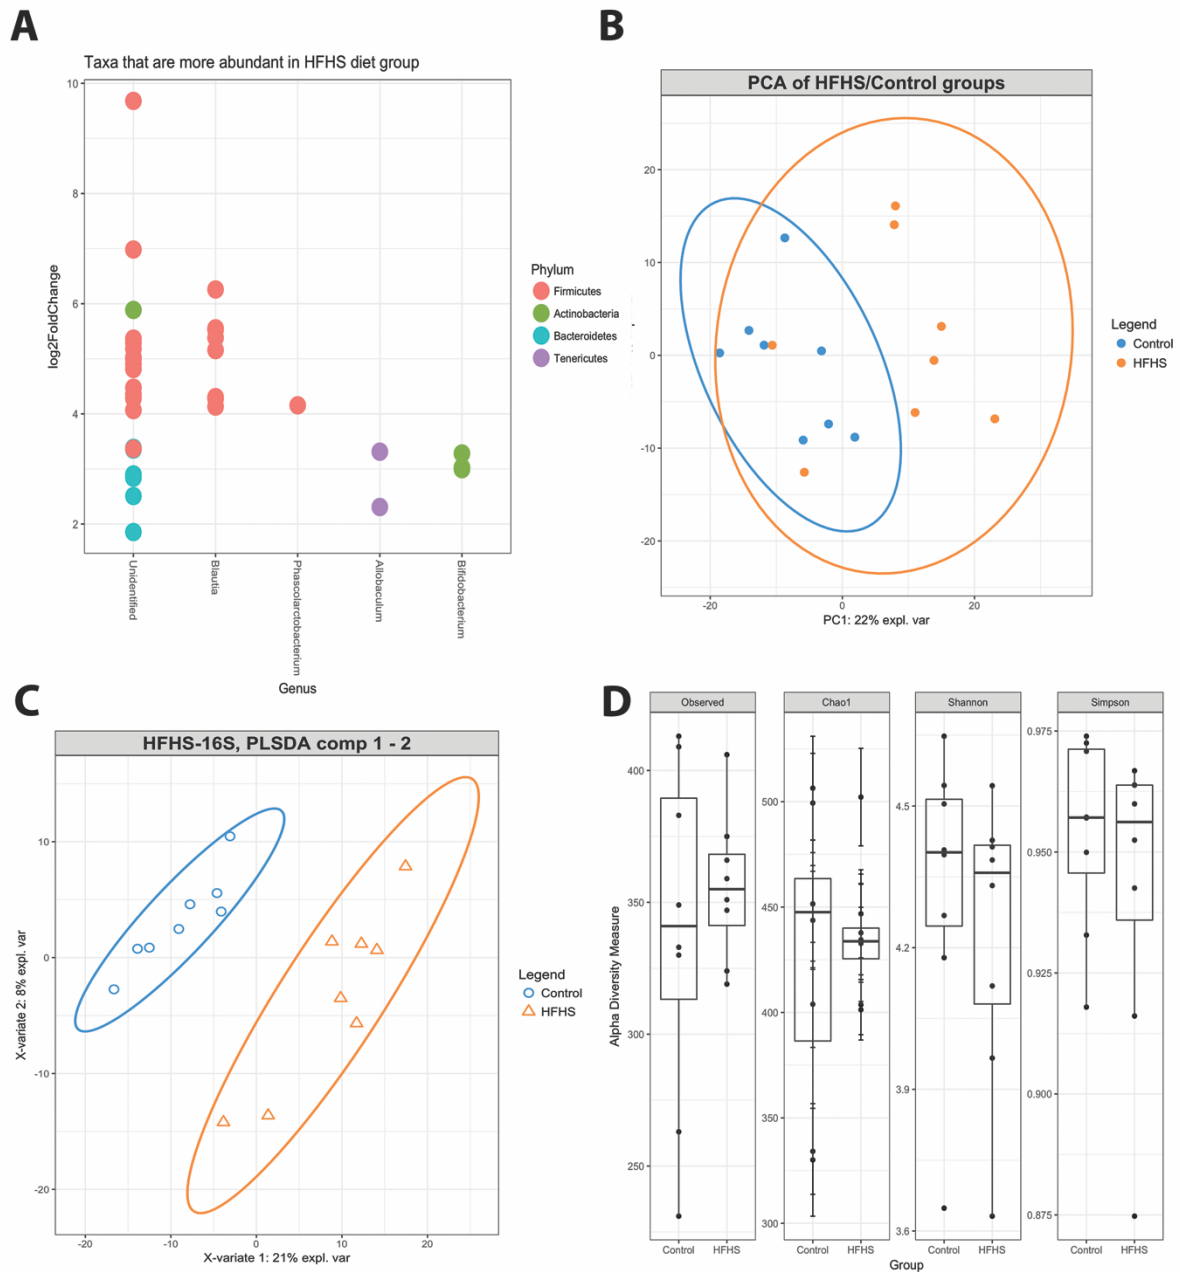

461

462 **Figure 3.** A) Graphical depiction of DESeq2 analysis. Each coloured circle represents one  
 463 bacterial genus that was more abundant in the HFHS than control group ( $q < 0.05$ ). Log<sub>2</sub> fold  
 464 change refers to the difference abundance of the log<sub>2</sub> values between diet groups for each  
 465 bacterial genus. B) Unsupervised Principle Component Analysis (PCA) plot of microbiome  
 466 samples from the HFHS diet (orange dots) and control diet (blue dots). The first component  
 467 explained 22% of variance; the second component 11%.

468 C) Partial least-squares discriminant analysis (PLS-DA) figure showing a large proportion of  
469 variance accounted for by the first component (21%) and a lesser degree by the second (8%).  
470 Each point represents a sample. D) No significant differences in alpha diversity of faecal  
471 microbiota between HFHS and control diet groups. Each panel represents one alpha diversity  
472 measure as follows: Observed = total number of OTU's observed; Chao1 = richness  
473 estimator (estimate of the total number of OTU's present in a community); Shannon and  
474 Simpson = microbial indexes of diversity. Boxes span the first to third quartiles; the  
475 horizontal line inside the boxes represents the median. Whiskers extending vertically from  
476 the boxes indicate variability outside the upper and lower quartiles, and the single black  
477 circles indicate outliers (all  $P > 0.05$ ).

478

### 479 *3.8. Associations between diet effects, behavioural performance and gene expression*

480 Correlations were performed between individual representative values of specific  
481 behaviours (social interaction pre consumption of diet, social recognition and novel object  
482 recognition) that differed between diet group and biological measurements (adiposity and  
483 cortical gene expression).

484 A number of associations were observed, in particular positive correlations between  
485 PFC expression of Maa and social interaction pre-HFHS diet and object memory. Full  
486 bivariate correlation analysis presented in Figure 4.

**a) Prefrontal Cortex**

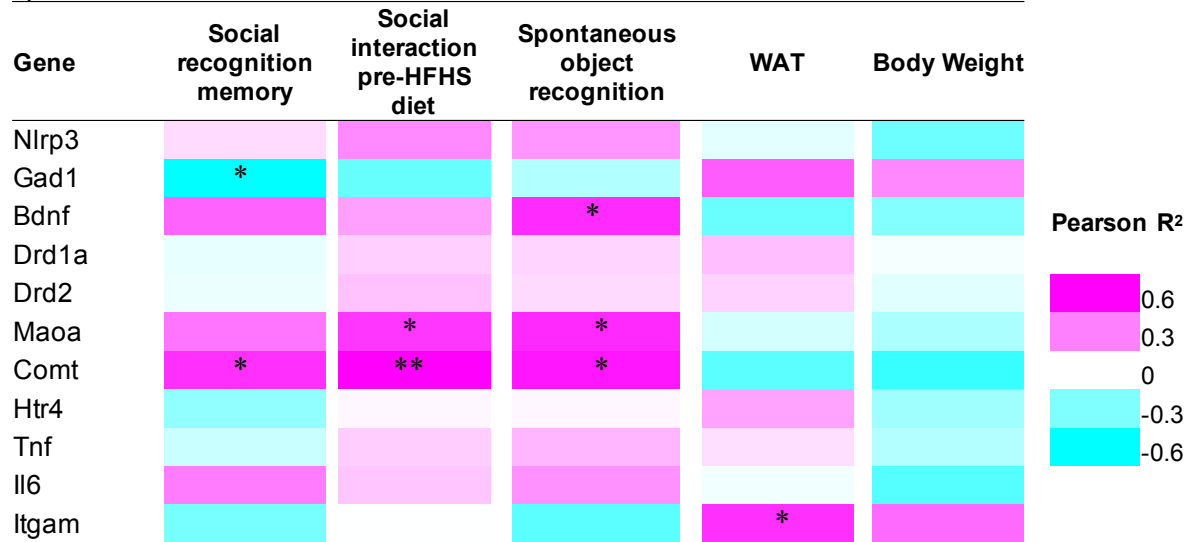

**b) Hippocampus**

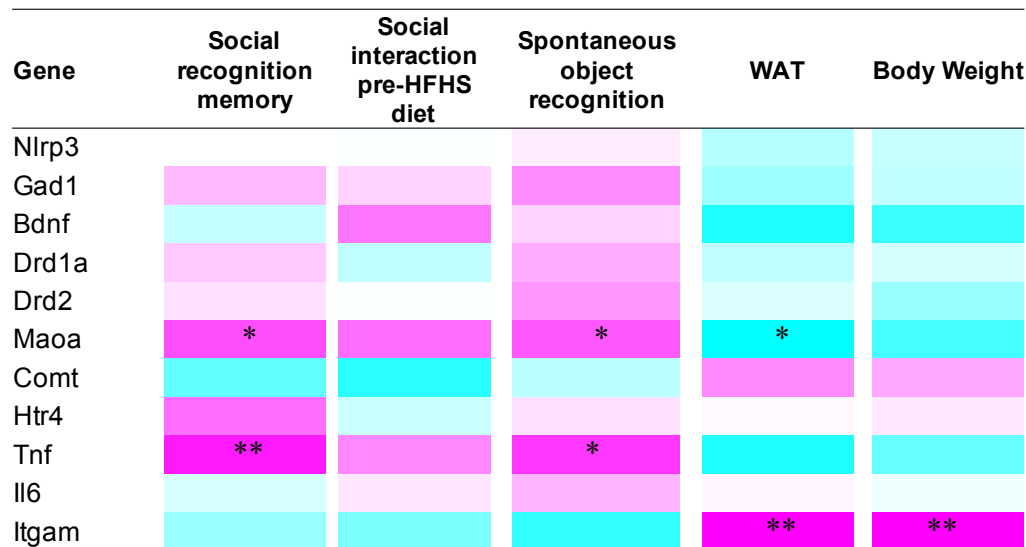

**c) Physiological parameters**

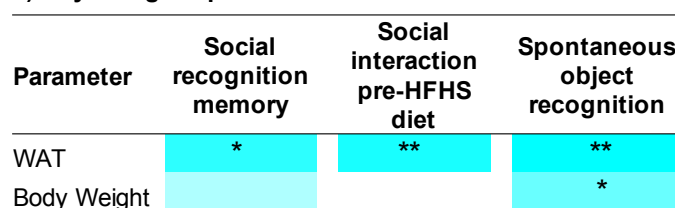

487

488 *Figure 4. Heatmap of bivariate correlations (Pearson's R<sup>2</sup>) between behavioural*

489 *assays – social recognition memory, social interaction and novel object recognition*

490 *performance, and a) prefrontal cortex gene expression, b) hippocampal gene expression and*

491 *c) physiological parameters. \*=P<0.05, \*\*=P<0.01*



492 A number of bivariate correlations between physiological parameters (WAT and  
493 bodyweight) and gene expression were significant (Figure 4a and b). In particular, PFC and  
494 hippocampal *Itgam* expression was positively correlated with WAT (PFC:  $r^2=0.52$ ,  $P<0.05$ ,  
495 HPC:  $r^2=0.66$ ,  $P<0.01$ ) and bodyweight (HPC:  $r^2=0.67$ ,  $P<0.01$ ), and hippocampal *Maoa*  
496 expression was negatively correlated with WAT ( $r^2=-0.45$ ,  $P<0.05$ ). Correlations between  
497 physiological parameters (WAT and bodyweight) and behavioural performance were  
498 observed (Figure 4c), in particular significant negative correlations between WAT and social  
499 recognition memory ( $r^2=-0.56$ ,  $P<0.05$ ), social interaction pre-HFHS diet ( $r^2=-0.58$ ,  $P<0.01$ )  
500 and novel object recognition performance ( $r^2=-0.65$ ,  $P<0.01$ ).

501

502 Total WAT was significantly associated with PFC gene expression ( $F(1,12)=5.4$ ,  
503  $P<0.05$ ); specifically *Tnf- $\alpha$*  (adjusted  $r^2=0.41$ ,  $P<0.01$ ), *Comt* (adjusted  $r^2=0.23$ ,  $P<0.05$ ),  
504 *Maoa* (adjusted  $r^2=0.29$ ,  $P<0.05$ ), and *Bdnf* (adjusted  $r^2=0.74$ ,  $P<0.001$ ). A number of  
505 bivariate correlations between bodyweight and gene expression were significant (Figure 4a  
506 and b) however these associations did not persist in multivariate linear modelling (overall  
507 model  $F(1,12)=2.1$ ,  $P=0.17$ ). There were no significant associations between hippocampal  
508 gene expression and body weight ( $F(1,13)<1$ ). WAT weight predicted *Il6* expression in the  
509 hippocampus ( $F(1,13)=4.86$ ,  $P=0.05$ ).

510 Associations between hippocampal and PFC genes differentially expressed in control  
511 and HFHS groups (see Table 1, Figure 4) and behavioural performance were examined. No  
512 predictive relationships were observed between PFC *Bdnf*, *Comt* or *Maoa* expression and  
513 social interaction pre diet consumption, social memory or novel object recognition ( $P=0.17$ ;  
514  $P=0.092$ ;  $P=0.16$  for overall model of each gene respectively). There was no evidence for a  
515 predictive relationship between hippocampal *Maoa* expression and behaviours ( $P=0.35$ ).

516

517 *3.9. Associations between gut microbiota composition and social behaviour*

518 Scores on pre-diet social behaviour, social recognition memory and novel object  
519 recognition tasks respectively were all significantly associated with the relative abundance of  
520 a number of bacterial taxa (all associations where  $q < 0.05$  presented in Table 2).

521 Social memory performance was associated with a large number of taxa. Higher social  
522 memory scores were associated with a greater abundance of bacteria from the  
523 *Bifidobacteriales* and *Bacteroidales* order, *Lachnospiraceae* family (*Blautia* and multiple  
524 unspecified genera), *Ruminococcaceae* family and genus *Allobaculum*. Novel object  
525 recognition was negatively associated with abundance of *Bacteroidales* and a number of taxa  
526 from the *Lachnospiraceae* family. Only three taxa were significantly associated with social  
527 behaviour pre HFHS diet: a relative reduction of *Bifidobacteriales* order and two unspecified  
528 genera from the *Lachnospiraceae* family.

529

530 ----- Table 2 here -----

531

532 *3.10. Firmicutes to Bacteroidetes ratio*

533 There were no significant differences between the diet groups on *Firmicutes* to  
534 *Bacteroidetes* ratio (FB ratio;  $t(9.63) = -1.03$ ,  $P = 0.33$ ). Samples were pooled for subsequent  
535 FB ratio analyses, with diet group included to control for potential interaction effects.  
536 Multivariate linear modelling demonstrated a significant relationship between FB ratio and  
537 the three behavioural dependent variables: social memory, novel object recognition and pre-  
538 diet social interaction ( $F(3,11) = 5.26$ ,  $P = 0.02$ ). Post-hoc tests demonstrated strong evidence  
539 that FB ratio negatively predicted “pre” diet social behaviour ( $F(2,13) = 11.46$ ,  $P = 0.001$ ), but  
540 not object or social recognition memory.

541

542       3.11.       *Associations between gut microbiota and hippocampal / PFC gene expression*

543               The hippocampal and PFC genes found to differ in expression between the control  
544 and HFHS diet groups (PFC: Bdnf, Maoa, Comt; hippocampus: Maoa,  $P_s < 0.05$ ) were tested  
545 for their associations with differential abundance of bacterial taxa. Of these, significantly  
546 differentially abundant taxa ( $q < 0.05$ ) were apparent only for Maoa (Table 3). PFC Maoa  
547 expression was positively associated with one genera of the *Lachnospiraceae* family, whilst a  
548 number of bacteria across the four primary phyla were differentially abundant on the basis of  
549 hippocampal Maoa expression in both positive and negative directions.

550                                               ----- Table 3 here -----

#### 551   **4. Discussion**

552               Here we show that daily limited consumption of a HFHS diet leads to alterations in  
553 social interaction and social memory in young rats, and impaired novel object recognition  
554 memory. Previous studies have shown that high-energy diets rapidly cause hippocampal-  
555 dependent memory deficits (Kanoski et al., 2007), but none have examined the impact of  
556 intermittent HFHS diets on social behaviours in rats. This is the first demonstration to  
557 associate diet-induced alterations to social behaviour with microbiota and brain changes in  
558 reward neurotransmission and neuroplasticity.

559

560               Intermittent access to a HFHS diet influenced the presentation of normal social  
561 behaviours, including social interaction and preference for social novelty. Consumption of a  
562 HFHS diet for 2h/day reduced duration engaged in social interaction prior to diet availability,  
563 but not following diet consumption. This indicates that when rats expected to receive the  
564 HFHS diet they were less willing to engage in social interaction, potentially underpinned by  
565 diet evoked alterations in Maoa and Comt expression, leading to changes in monoamine

566 neurotransmission, or increased anxiety. Thus, limited access to a HFHS diet may influence  
567 social interaction, as comparable interaction durations were observed following access to the  
568 HFHS food. Moreover, social interaction frequency was increased after rats had access to the  
569 HFHS food, suggesting that following consumption of HFHS diet these rats may find  
570 interaction more rewarding, or may have reduced anxiety. Social play is important for  
571 neurobehavioural development; however, we did not observe differences in frequencies  
572 between diet groups. This may be due to the group housing conditions and short period of  
573 isolation used prior to behavioural testing; as a recent study reported that isolation amplified  
574 social play behaviour (Carvalho et al., 2016). Another possible explanation is that social play  
575 declines across adolescence, and that the apparent lack of social play differences was due to  
576 the rats age at testing (mid-late adolescence) (Trezza et al., 2010). Further studies should be  
577 conducted to examine whether diet manipulations specifically during adolescence endure into  
578 adulthood to identify whether adolescence poses as a critical window of vulnerability to  
579 social behavioural changes.

580

581 Social recognition memory differed between control and HFHS rats, with HFHS rats  
582 showing no observed preference for the chamber containing the novel rat during the test  
583 phase, indicative of impaired social memory. This complements a recent study showing that  
584 an acute exposure to high fat diet in juvenile rats impaired social memory (Yaseen et al.,  
585 2018). As rats showed differences in their duration of time engaged in social interaction prior  
586 to consuming the HFHS food, the social memory testing was conducted following HFHS  
587 access, to ensure that any memory deficits observed were not due to reduced social contact in  
588 the HFHS diet rats. Initial sociability during the sample phase did not differ between HFHS  
589 and control diet rats, thus it appears that social memory was impacted specifically by diet.  
590 Social memory has been shown to depend upon both PFC and hippocampal function (Kogan

591 et al., 2000; Tanimizu et al., 2017), and our observed alterations to markers of monoamine  
592 neurotransmission and neuroplasticity may underpin social changes. This is also  
593 complemented by impaired long term novel object recognition, again indicative of  
594 hippocampal dysfunction (Warburton and Brown, 2010). Moreover, both HFHS and control  
595 diet rats showed preference for a social odour and showed intact odour recognition memory.  
596 Thus, intermittent HFHS diet did not impact olfactory discrimination, and highlights that  
597 social memory deficits are unlikely to be underpinned by impaired odour discrimination.

598

599 Diet-correlated alterations to mRNA expression of enzymes Maa and Comt, were  
600 observed in the PFC, indicating that HFHS diet consumption impacts on monoamine  
601 neurotransmission integral for social behaviour and cognition. Dopamine is a critical  
602 neurotransmitter in the regulation of food intake; in particular dopamine activity in the  
603 mesocorticolimbic dopamine circuitry is associated with food reward (Volkow et al., 2011).  
604 Maa, the gene for monoamine oxidase, deaminates dopamine and has a key role in  
605 controlling the availability of cortical dopamine. Similarly, Comt is involved in the  
606 degradation of dopamine. Changes to monoamine signalling may therefore underpin the  
607 altered social behaviour and social memory observed in HFHS diet rats, supported by reports  
608 of diet-induced alterations to dopamine receptor expression in the striatum (Johnson and  
609 Kenny, 2010). However, we observed no dopamine receptor (Drd1a/Drd2) expression  
610 changes in the hippocampus or PFC, suggesting that these receptor mRNA changes may be  
611 specific to striatal regions following palatable high sugar diets (Naneix et al., 2018; Naneix et  
612 al., 2017). Further studies should examine whether other reward associated genes, such as  
613 serotonin and mu-opioid receptors are altered by this diet protocol, and also the involvement  
614 of oxytocin signalling mechanisms (Yaseen et al., 2018).

615

616           Reduced PFC Bdnf expression was observed in HFHS consuming rats, which also  
617 correlated positively with novel object recognition performance. This diet-induced change  
618 may underpin the changes to social behaviours and cognition as BDNF signalling has a  
619 critical role in memory encoding (Choi et al., 2010). Decreased levels of BDNF in the  
620 hypothalamus, PFC or serum have been shown to correlate with depression-like behaviours  
621 in animals and humans (Bocchio-Chiavetto et al., 2010) and high fat diet consumption  
622 reduces hippocampal BDNF levels (Molteni et al., 2004; Pistell et al., 2010) linking BDNF to  
623 emotional processes. Gut microbiota composition is also linked to alterations in BDNF within  
624 regions essential for learning and emotional behaviours, as demonstrated by previous studies  
625 indicate reduced cortical and hippocampal Bdnf gene expression in GF mice (Sudo et al.,  
626 2004), and antibiotic-induced microbiota dysbiosis altered protein levels of BDNF in the  
627 amygdala and hippocampus as well as reduced anxiety-like behaviours in the light-dark box  
628 (Bercik et al., 2011). This provides a mechanistic insight into the influence of the microbiome  
629 in cognition and emotional regulation via BDNF expression.

630

631           Excessive consumption of saturated fats is shown to induce secretion of pro-  
632 inflammatory cytokines by adipocytes and macrophages, and affect the integrity of the blood-  
633 brain barrier (BBB) (Kanoski et al., 2010), allowing pro-inflammatory cytokines and immune  
634 cells to reach the brain (Thaler et al., 2012). Interestingly, no significant changes between  
635 groups were observed to inflammatory marker mRNA expression (Il6, TNF- $\alpha$ , Nlrp3, Itgam)  
636 were observed in this study, and trends indicated that PFC expression of Il6 and Nlrp3 was  
637 lower in HFHS diet rats compared to controls. This may be due to the age of the rats, as  
638 emergent evidence suggests that the modulatory effects of obesogenic diets on inflammatory  
639 markers occur in an age-dependent manner, with younger rats showing resistance to  
640 neuroinflammation (Teixeira et al., 2017). However, Itgam (cluster of differentiation

641 molecule 11b, CD11b) expression in the PFC and hippocampus positively correlated with  
642 WAT, indicative that increased adiposity was associated with aspects of neuroinflammation.  
643 Itgam is expressed by microglia, and also neutrophils and monocytes in the injured brain  
644 (Jeong et al., 2013). More so, evidence indicates that obesity-induced neuroinflammation is  
645 dependent on the type of diet in terms of fat and sugar content, the duration of the diet and  
646 regional differences in brain structures (Guillemot-Legrís and Muccioli, 2017). Future studies  
647 utilising immunohistochemistry to examine microglia morphology and astrogliosis and  
648 protein markers are needed to validate the region specific impact of obesogenic diets on  
649 mPFC and hippocampal neuroinflammatory markers.

650

651 HFHS diet consumption resulted in significantly increased WAT deposits  
652 characteristic of diet-induced obesity, and has been previously associated with decreased  
653 abundance of *Bacteroidetes* and increases in *Firmicutes* bacteria (Ley et al., 2005); however,  
654 we did not observe overall alterations to the *Firmicutes* to *Bacteroidetes* ratio with this  
655 intermittent feeding schedule. Our study suggests that members of *Bacteroidetes* (order  
656 *Bacteroidales*) were significantly increased in rats that consumed HFHS diets. Therefore, not  
657 all the members of the *Bacteroidetes* family are decreased with adiposity. However, it is  
658 possible that *Firmicutes* to *Bacteroidetes* ratio changes become more prominent with the  
659 ongoing development of obesity and chronic consumption of HFHS diets, rather than short-  
660 term intake of such foods. Differential abundance analyses demonstrated that taxa from  
661 *Lachnospiraceae* and *Ruminococcaceae* families of the *Clostridiales* order were the most  
662 common bacterial predictors of social behaviour and recognition memory, converging with  
663 clinical studies that show similar changes to microbiome populations in neuropsychiatric  
664 disorders including major depressive disorder and autism (De Angelis et al., 2013;  
665 Naseribafrouei et al., 2014). Moreover, social avoidance behaviour in adult mice is associated

666 with increased abundance of *Lachnospiraceae*, *Ruminococcaceae* and *Clostridiales* in non-  
667 obese diabetic mice, and the transfer of intestinal microbiota from these mice to microbiota-  
668 depleted recipients evoked similar behavioural phenotypes (Gacias et al., 2016), suggesting a  
669 key role of diet and metabolism in microbiota signatures. As such, converging evidence  
670 indicates the potential influence of diet on social development and social behaviours via the  
671 gut-brain-microbiota axis (Christian et al., 2015; Parashar and Udayabanu, 2016).

672

### 673 *Future studies*

674 Future studies should examine whether faecal transplants from HFHS diet animals  
675 evokes similar behavioural and cortical gene expression changes in *Maoa*, *Comt* and *Bdnf*  
676 allowing for increased mechanistic insights into the effects of the microbiome on the brain.  
677 Furthermore, predictions of the metagenome functional content from the bacterial  
678 communities would further provide insight into the metabolic pathways affected by  
679 intermittent HFHS diet consumption. Modulation of the gut-brain axis dynamics has clinical  
680 implications for mental health conditions, and as such the use of “psychobiotics” is posited as  
681 a novel therapeutic avenue for psychiatric disorders and diet-induced cognitive changes.  
682 Treatment strategies that target the gut microbiome should be explored, such as commensal  
683 bacteria, which have been shown to ameliorate depressive (Bravo et al., 2011) and anxiety-  
684 like behaviour (Bercik et al., 2011), and prebiotics which increase *Bdnf* mRNA expression in  
685 the hippocampus (Burokas et al., 2017). These may provide a route for the attenuation of diet  
686 and obesity evoked cognitive and emotional alterations.

687

### 688 *Conclusions and implications*

689 In conclusion, these results demonstrate that intermittent access to a HFHS diet can  
690 rapidly impact social behaviour and cognition, evoke alterations in cortical gene expression,



691 and alter microbiota composition. Modulation of the microbiota may lead to the emergence  
692 of novel therapies to combat social, emotional and cognitive deficits, which have been linked  
693 with metabolic disorders, and for the treatment of neuropsychiatric disorders.

694

## 695 **5. Acknowledgments**

696 This work was supported by an Australian Research Council Discovery Early Career  
697 Research Award (DE140101071) to ACR. JD receives funding from the Royal Society (UK)  
698 grant (RG130316) and an Alzheimer's Society Fellowship (AS-JF-15-008). The authors wish  
699 to thank Professor Anthony Hannan for his helpful feedback on the manuscript. All authors  
700 report no biomedical financial interests or potential conflicts of interest.

701

## 702 **References**

703 Albenberg, L. G., Wu, G. D., 2014. Diet and the intestinal microbiome: associations,  
704 functions, and implications for health and disease. *Gastroenterology* 146, 1564-1572.

705 Ashelford, K. E., Chuzhanova, N. A., Fry, J. C., Jones, A. J., Weightman, A. J., 2005. At  
706 least 1 in 20 16S rRNA sequence records currently held in public repositories is estimated to  
707 contain substantial anomalies. *Appl Environ Microbiol* 71, 7724-7736.

708 Baker, K. D., Loughman, A., Spencer, S. J., Reichelt, A. C., 2017. The impact of obesity and  
709 hypercaloric diet consumption on anxiety and emotional behavior across the lifespan.  
710 *Neurosci Biobehav Rev* 83, 173-182.

711 Baker, K. D., Reichelt, A. C., 2016. Impaired fear extinction retention and increased anxiety-  
712 like behaviours induced by limited daily access to a high-fat/high-sugar diet in male rats:  
713 Implications for diet-induced prefrontal cortex dysregulation. *Neurobiol Learn Mem* 136,  
714 127-138.

715 Benjamini, Y., Drai, D., Elmer, G., Kafkafi, N., Golani, I., 2001. Controlling the false  
716 discovery rate in behavior genetics research. *Behav Brain Res* 125, 279-284.

717 Bercik, P., Denou, E., Collins, J., Jackson, W., Lu, J., Jury, J., Deng, Y., Blennerhassett, P.,  
718 Macri, J., McCoy, K. D., Verdu, E. F., Collins, S. M., 2011. The intestinal microbiota affect  
719 central levels of brain-derived neurotropic factor and behavior in mice. *Gastroenterology* 141,  
720 599-609, 609 e591-593.

721 Bicks, L. K., Koike, H., Akbarian, S., Morishita, H., 2015. Prefrontal Cortex and Social  
722 Cognition in Mouse and Man. *Front Psychol* 6, 1805.

723 Bocarsly, M. E., Hoebel, B. G., Paredes, D., von Loga, I., Murray, S. M., Wang, M., Arolfo,  
724 M. P., Yao, L., Diamond, I., Avena, N. M., 2014. GS 455534 selectively suppresses binge  
725 eating of palatable food and attenuates dopamine release in the accumbens of sugar-bingeing  
726 rats. *Behav Pharmacol* 25, 147-157.

727 Bocchio-Chiavetto, L., Bagnardi, V., Zanardini, R., Molteni, R., Nielsen, M. G., Placentino,  
728 A., Giovannini, C., Rillosi, L., Ventriglia, M., Riva, M. A., Gennarelli, M., 2010. Serum and  
729 plasma BDNF levels in major depression: a replication study and meta-analyses. *World J*  
730 *Biol Psychiatry* 11, 763-773.

731 Braithwaite, I., Stewart, A. W., Hancox, R. J., Beasley, R., Murphy, R., Mitchell, E. A.,  
732 Group, I. P. T. S., Group, I. P. T. S., 2014. Fast-food consumption and body mass index in  
733 children and adolescents: an international cross-sectional study. *BMJ Open* 4, e005813.

734 Bravo, J. A., Dinan, T. G., Cryan, J. F., 2011. Alterations in the central CRF system of two  
735 different rat models of comorbid depression and functional gastrointestinal disorders. *Int J*  
736 *Neuropsychopharmacol* 14, 666-683.

737 Burokas, A., Arboleya, S., Moloney, R. D., Peterson, V. L., Murphy, K., Clarke, G., Stanton,  
738 C., Dinan, T. G., Cryan, J. F., 2017. Targeting the Microbiota-Gut-Brain Axis: Prebiotics

739 Have Anxiolytic and Antidepressant-like Effects and Reverse the Impact of Chronic Stress in  
740 Mice. *Biol Psychiatry* 82, 472-487.

741 Carvalho, A. L. O., Ferri, B. G., de Sousa, F. A. L., Vilela, F. C., Giusti-Paiva, A., 2016.  
742 Early life overnutrition induced by litter size manipulation decreases social play behavior in  
743 adolescent male rats. *Int J Dev Neurosci* 53, 75-82.

744 Choi, D. C., Maguschak, K. A., Ye, K., Jang, S. W., Myers, K. M., Ressler, K. J., 2010.  
745 Prelimbic cortical BDNF is required for memory of learned fear but not extinction or innate  
746 fear. *Proc Natl Acad Sci U S A* 107, 2675-2680.

747 Christian, L. M., Galley, J. D., Hade, E. M., Schoppe-Sullivan, S., Kamp Dush, C., Bailey,  
748 M. T., 2015. Gut microbiome composition is associated with temperament during early  
749 childhood. *Brain Behav Immun* 45, 118-127.

750 Crawley, J. N., Chen, T., Puri, A., Washburn, R., Sullivan, T. L., Hill, J. M., Young, N. B.,  
751 Nadler, J. J., Moy, S. S., Young, L. J., Caldwell, H. K., Young, W. S., 2007. Social approach  
752 behaviors in oxytocin knockout mice: comparison of two independent lines tested in different  
753 laboratory environments. *Neuropeptides* 41, 145-163.

754 Davis, J. F., Tracy, A. L., Schurdak, J. D., Tschop, M. H., Lipton, J. W., Clegg, D. J., Benoit,  
755 S. C., 2008. Exposure to elevated levels of dietary fat attenuates psychostimulant reward and  
756 mesolimbic dopamine turnover in the rat. *Behav Neurosci* 122, 1257-1263.

757 De Angelis, M., Piccolo, M., Vannini, L., Siragusa, S., De Giacomo, A., Serrazanetti, D. I.,  
758 Cristofori, F., Guerzoni, M. E., Gobbetti, M., Francavilla, R., 2013. Fecal microbiota and  
759 metabolome of children with autism and pervasive developmental disorder not otherwise  
760 specified. *PLoS One* 8, e76993.

761 Del Rio, D., Morales, L., Ruiz-Gayo, M., Del Olmo, N., 2016. Effect of high-fat diets on  
762 mood and learning performance in adolescent mice. *Behav Brain Res* 311, 167-172.

763 DeSantis, T. Z., Hugenholtz, P., Larsen, N., Rojas, M., Brodie, E. L., Keller, K., Huber, T.,  
764 Dalevi, D., Hu, P., Andersen, G. L., 2006. Greengenes, a chimera-checked 16S rRNA gene  
765 database and workbench compatible with ARB. *Appl Environ Microbiol* 72, 5069-5072.

766 Desbonnet, L., Clarke, G., Traplin, A., O'Sullivan, O., Crispie, F., Moloney, R. D., Cotter, P.  
767 D., Dinan, T. G., Cryan, J. F., 2015. Gut microbiota depletion from early adolescence in  
768 mice: Implications for brain and behaviour. *Brain Behav Immun* 48, 165-173.

769 Edgar, R. C., 2010. Search and clustering orders of magnitude faster than BLAST.  
770 *Bioinformatics* 26, 2460-2461.

771 Fadrosch, D. W., Ma, B., Gajer, P., Sengamalay, N., Ott, S., Brotman, R. M., Ravel, J., 2014.  
772 An improved dual-indexing approach for multiplexed 16S rRNA gene sequencing on the  
773 Illumina MiSeq platform. *Microbiome* 2, 6.

774 Frohlich, E. E., Farzi, A., Mayerhofer, R., Reichmann, F., Jacan, A., Wagner, B., Zinser, E.,  
775 Bordag, N., Magnes, C., Frohlich, E., Kashofer, K., Gorkiewicz, G., Holzer, P., 2016.  
776 Cognitive impairment by antibiotic-induced gut dysbiosis: Analysis of gut microbiota-brain  
777 communication. *Brain Behav Immun* 56, 140-155.

778 Furlong, T. M., Jayaweera, H. K., Balleine, B. W., Corbit, L. H., 2014. Binge-like  
779 consumption of a palatable food accelerates habitual control of behavior and is dependent on  
780 activation of the dorsolateral striatum. *J Neurosci* 34, 5012-5022.

781 Gacias, M., Gaspari, S., Santos, P. M., Tamburini, S., Andrade, M., Zhang, F., Shen, N.,  
782 Tolstikov, V., Kiebish, M. A., Dupree, J. L., Zachariou, V., Clemente, J. C., Casaccia, P.,  
783 2016. Microbiota-driven transcriptional changes in prefrontal cortex override genetic  
784 differences in social behavior. *Elife* 5.

785 Guillemot-Legris, O., Muccioli, G. G., 2017. Obesity-Induced Neuroinflammation: Beyond  
786 the Hypothalamus. *Trends Neurosci* 40, 237-253.

- 787 Jeong, H. K., Ji, K., Min, K., Joe, E. H., 2013. Brain inflammation and microglia: facts and  
788 misconceptions. *Exp Neurobiol* 22, 59-67.
- 789 Johnson, P. M., Kenny, P. J., 2010. Dopamine D2 receptors in addiction-like reward  
790 dysfunction and compulsive eating in obese rats. *Nat Neurosci* 13, 635-641.
- 791 Kanoski, S. E., Meisel, R. L., Mullins, A. J., Davidson, T. L., 2007. The effects of energy-  
792 rich diets on discrimination reversal learning and on BDNF in the hippocampus and  
793 prefrontal cortex of the rat. *Behav Brain Res* 182, 57-66.
- 794 Kanoski, S. E., Zhang, Y., Zheng, W., Davidson, T. L., 2010. The effects of a high-energy  
795 diet on hippocampal function and blood-brain barrier integrity in the rat. *J Alzheimers Dis*  
796 21, 207-219.
- 797 Kim, Y., Venkataraju, K. U., Pradhan, K., Mende, C., Taranda, J., Turaga, S. C., Arganda-  
798 Carreras, I., Ng, L., Hawrylycz, M. J., Rockland, K. S., Seung, H. S., Osten, P., 2015.  
799 Mapping social behavior-induced brain activation at cellular resolution in the mouse. *Cell*  
800 Rep 10, 292-305.
- 801 Kogan, J. H., Frankland, P. W., Silva, A. J., 2000. Long-term memory underlying  
802 hippocampus-dependent social recognition in mice. *Hippocampus* 10, 47-56.
- 803 Kolb, B., 1974. Social behavior of rats with chronic prefrontal lesions. *J Comp Physiol*  
804 Psychol 87, 466-474.
- 805 Labouesse, M. A., Lassalle, O., Richetto, J., Iafrati, J., Weber-Stadlbauer, U., Notter, T.,  
806 Gschwind, T., Pujadas, L., Soriano, E., Reichelt, A. C., Labouesse, C., Langhans, W., Chavis,  
807 P., Meyer, U., 2017. Hypervulnerability of the adolescent prefrontal cortex to nutritional  
808 stress via reelin deficiency. *Mol Psychiatry* 22, 961-971.
- 809 Ley, R. E., Backhed, F., Turnbaugh, P., Lozupone, C. A., Knight, R. D., Gordon, J. I., 2005.  
810 Obesity alters gut microbial ecology. *Proc Natl Acad Sci U S A* 102, 11070-11075.

- 811 Livak, K. J., Schmittgen, T. D., 2001. Analysis of relative gene expression data using real-  
812 time quantitative PCR and the  $2^{-(\Delta\Delta C(T))}$  Method. *Methods* 25, 402-408.
- 813 Love, M. I., Huber, W., Anders, S., 2014. Moderated estimation of fold change and  
814 dispersion for RNA-seq data with DESeq2. *Genome Biol* 15, 550.
- 815 Molteni, R., Wu, A., Vaynman, S., Ying, Z., Barnard, R. J., Gomez-Pinilla, F., 2004.  
816 Exercise reverses the harmful effects of consumption of a high-fat diet on synaptic and  
817 behavioral plasticity associated to the action of brain-derived neurotrophic factor.  
818 *Neuroscience* 123, 429-440.
- 819 Naneix, F., Darlot, F., De Smedt-Peyrusse, V., Pape, J. R., Coutureau, E., Cador, M., 2018.  
820 Protracted motivational dopamine-related deficits following adolescence sugar  
821 overconsumption. *Neuropharmacology* 129, 16-25.
- 822 Naneix, F., Tantot, F., Glangetas, C., Kaufling, J., Janthakhin, Y., Boitard, C., De Smedt-  
823 Peyrusse, V., Pape, J. R., Vancassel, S., Trifilieff, P., Georges, F., Coutureau, E., Ferreira, G.,  
824 2017. Impact of Early Consumption of High-Fat Diet on the Mesolimbic Dopaminergic  
825 System. *eNeuro* 4.
- 826 Naseribafrouei, A., Hestad, K., Avershina, E., Sekelja, M., Linlokken, A., Wilson, R., Rudi,  
827 K., 2014. Correlation between the human fecal microbiota and depression.  
828 *Neurogastroenterol Motil* 26, 1155-1162.
- 829 Ogden, C. L., Carroll, M. D., Kit, B. K., Flegal, K. M., 2014. Prevalence of childhood and  
830 adult obesity in the United States, 2011-2012. *JAMA* 311, 806-814.
- 831 Okuyama, T., Kitamura, T., Roy, D. S., Itohara, S., Tonegawa, S., 2016. Ventral CA1  
832 neurons store social memory. *Science* 353, 1536-1541.
- 833 Parashar, A., Udayabanu, M., 2016. Gut microbiota regulates key modulators of social  
834 behavior. *Eur Neuropsychopharmacol* 26, 78-91.

835 Pistell, P. J., Morrison, C. D., Gupta, S., Knight, A. G., Keller, J. N., Ingram, D. K., Bruce-  
836 Keller, A. J., 2010. Cognitive impairment following high fat diet consumption is associated  
837 with brain inflammation. *J Neuroimmunol* 219, 25-32.

838 Reichelt, A. C., 2016. Adolescent Maturation Transitions in the Prefrontal Cortex and  
839 Dopamine Signaling as a Risk Factor for the Development of Obesity and High Fat/High  
840 Sugar Diet Induced Cognitive Deficits. *Front Behav Neurosci* 10, 189.

841 Reichelt, A. C., Rank, M. M., 2017. The impact of junk foods on the adolescent brain. *Birth*  
842 *Defects Res* 109, 1649-1658.

843 Rudebeck, P. H., Walton, M. E., Millette, B. H., Shirley, E., Rushworth, M. F., Bannerman,  
844 D. M., 2007. Distinct contributions of frontal areas to emotion and social behaviour in the rat.  
845 *Eur J Neurosci* 26, 2315-2326.

846 Selimbeyoglu, A., Kim, C. K., Inoue, M., Lee, S. Y., Hong, A. S. O., Kauvar, I.,  
847 Ramakrishnan, C., Fenno, L. E., Davidson, T. J., Wright, M., Deisseroth, K., 2017.  
848 Modulation of prefrontal cortex excitation/inhibition balance rescues social behavior in  
849 CNTNAP2-deficient mice. *Sci Transl Med* 9.

850 Skelly, M. J., Chappell, A. E., Carter, E., Weiner, J. L., 2015. Adolescent social isolation  
851 increases anxiety-like behavior and ethanol intake and impairs fear extinction in adulthood:  
852 Possible role of disrupted noradrenergic signaling. *Neuropharmacology* 97, 149-159.

853 Spear, L. P., 2000. The adolescent brain and age-related behavioral manifestations. *Neurosci*  
854 *Biobehav Rev* 24, 417-463.

855 Sudo, N., Aiba, Y., Oyama, N., Yu, X. N., Matsunaga, M., Koga, Y., Kubo, C., 2004. Dietary  
856 nucleic acid and intestinal microbiota synergistically promote a shift in the Th1/Th2 balance  
857 toward Th1-skewed immunity. *Int Arch Allergy Immunol* 135, 132-135.

858 Takase, K., Tsuneoka, Y., Oda, S., Kuroda, M., Funato, H., 2016. High-fat diet feeding alters  
859 olfactory-, social-, and reward-related behaviors of mice independent of obesity. *Obesity*  
860 (Silver Spring) 24, 886-894.

861 Tanimizu, T., Kenney, J. W., Okano, E., Kadoma, K., Frankland, P. W., Kida, S., 2017.  
862 Functional Connectivity of Multiple Brain Regions Required for the Consolidation of Social  
863 Recognition Memory. *J Neurosci* 37, 4103-4116.

864 Teixeira, D., Ceconello, A. L., Partata, W. A., de Fraga, L. S., Ribeiro, M. F. M., Guedes, R.  
865 P., 2017. The metabolic and neuroinflammatory changes induced by consuming a cafeteria  
866 diet are age-dependent. *Nutr Neurosci*, 1-11.

867 Thaler, J. P., Yi, C. X., Schur, E. A., Guyenet, S. J., Hwang, B. H., Dietrich, M. O., Zhao, X.,  
868 Sarruf, D. A., Izgur, V., Maravilla, K. R., Nguyen, H. T., Fischer, J. D., Matsen, M. E.,  
869 Wisse, B. E., Morton, G. J., Horvath, T. L., Baskin, D. G., Tschop, M. H., Schwartz, M. W.,  
870 2012. Obesity is associated with hypothalamic injury in rodents and humans. *J Clin Invest*  
871 122, 153-162.

872 Trezza, V., Baarendse, P. J., Vanderschuren, L. J., 2010. The pleasures of play:  
873 pharmacological insights into social reward mechanisms. *Trends Pharmacol Sci* 31, 463-469.

874 Velkoska, E., Warner, F. J., Cole, T. J., Smith, I., Morris, M. J., 2010. Metabolic effects of  
875 low dose angiotensin converting enzyme inhibitor in dietary obesity in the rat. *Nutr Metab*  
876 *Cardiovasc Dis* 20, 49-55.

877 Volkow, N. D., Wang, G. J., Baler, R. D., 2011. Reward, dopamine and the control of food  
878 intake: implications for obesity. *Trends Cogn Sci* 15, 37-46.

879 Warburton, E. C., Brown, M. W., 2010. Findings from animals concerning when interactions  
880 between perirhinal cortex, hippocampus and medial prefrontal cortex are necessary for  
881 recognition memory. *Neuropsychologia* 48, 2262-2272.



882 Yaseen, A., Shrivastava, K., Zuri, Z., Hatoum, O. A., Maroun, M., 2018. Prefrontal Oxytocin  
883 is Involved in Impairments in Prefrontal Plasticity and Social Memory Following Acute  
884 Exposure to High Fat Diet in Juvenile Animals. Cereb Cortex.  
885  
886  
887  
888  
889  
890  
891

892 **Tables**

893 **Table 1:** The effects of intermittent high fat and high sucrose (HFHS) diet exposure on  
894 prefrontal cortex and hippocampal gene expression, mean ( $\pm$ SEM), \* =  $P < 0.05$ , \*\* =  $P < 0.01$ ,  
895 # =  $P < 0.10$

896

897 **Table 2.** Associations between relative abundance of taxa in faecal microbiota and  
898 behavioural outcomes ( $q < 0.05$ ).

899

900 **Table 3.** Associations between relative abundance of taxa in faecal microbiota and gene  
901 expression ( $q < 0.05$ ).

902

903

904

**Table 2.** Associations between relative abundance of taxa in faecal microbiota and behavioural outcomes ( $q < 0.05$ ).

| Phylum         | Class           | Order              | Family              | Genus       | Social recognition memory |       | Object recognition memory |       | Pre-diet social interaction |     |  |  |
|----------------|-----------------|--------------------|---------------------|-------------|---------------------------|-------|---------------------------|-------|-----------------------------|-----|--|--|
|                |                 |                    |                     |             | log2FoldChange            | $q$   | log2FoldChange            | $q$   | log2FoldChange              | $q$ |  |  |
| Actinobacteria | Actinobacteria  | Bifidobacteriales  | Unspecified         | Unspecified | 5.13                      | <0.01 |                           |       | -0.04                       | 0.0 |  |  |
|                |                 | Bacteroidia        |                     |             | Bacteroidales             |       |                           | -7.27 | 0.03                        |     |  |  |
|                |                 |                    |                     |             | 8.51                      | <0.01 |                           |       |                             |     |  |  |
|                |                 |                    |                     |             | 4.59                      | 0.04  |                           |       |                             |     |  |  |
|                |                 |                    |                     |             | 4.20                      | <0.01 | -9.99                     | <0.01 |                             |     |  |  |
|                |                 |                    |                     |             | -4.87                     | 0.04  |                           |       |                             |     |  |  |
|                |                 |                    |                     |             | 4.28                      | 0.04  |                           |       |                             |     |  |  |
|                |                 |                    |                     |             | 4.24                      | 0.05  |                           |       |                             |     |  |  |
|                |                 |                    |                     |             | 4.66                      | 0.04  |                           |       |                             |     |  |  |
|                |                 |                    |                     |             | 4.30                      | 0.02  |                           |       |                             |     |  |  |
| Firmicutes     | Clostridia      | Clostridiales      | Lachnospiraceae     | Unspecified |                           |       |                           |       | -0.04                       | 0.0 |  |  |
|                |                 |                    |                     |             |                           |       |                           |       | -0.04                       | 0.0 |  |  |
|                |                 |                    |                     |             |                           |       |                           |       |                             |     |  |  |
|                |                 |                    |                     |             |                           |       |                           |       |                             |     |  |  |
|                |                 |                    |                     |             |                           |       |                           |       |                             |     |  |  |
|                |                 |                    |                     |             |                           |       |                           |       |                             |     |  |  |
|                |                 |                    |                     |             |                           |       |                           |       |                             |     |  |  |
|                |                 |                    |                     |             |                           |       |                           |       |                             |     |  |  |
|                |                 |                    |                     |             |                           |       |                           |       |                             |     |  |  |
|                |                 |                    |                     |             |                           |       |                           |       |                             |     |  |  |
| Tenericutes    | Erysipelotrichi | Erysipelotrichales | Erysipelotrichaceae | Allobaculum |                           |       |                           |       |                             |     |  |  |
|                |                 |                    |                     |             |                           |       |                           |       |                             |     |  |  |
|                |                 |                    |                     |             |                           |       |                           |       |                             |     |  |  |
|                |                 |                    |                     |             |                           |       |                           |       |                             |     |  |  |
|                |                 |                    |                     |             |                           |       |                           |       |                             |     |  |  |

905

906

**Table 3.** Associations between relative abundance of taxa in faecal microbiota and gene expression ( $q < 0.05$ ).

| Phylum         | Class           | Order              | Family              | Genus           | Maoa Hippocampus |          | Maoa Prefrontal cortex |          |
|----------------|-----------------|--------------------|---------------------|-----------------|------------------|----------|------------------------|----------|
|                |                 |                    |                     |                 | log2Fold Change  | <i>q</i> | log2Fold Change        | <i>q</i> |
| Actinobacteria | Actinobacteria  | Bifidobacteriales  | Unspecified         | Unspecified     | -7.19            | 0.05     |                        |          |
|                |                 |                    |                     |                 | -7.87            | 0.01     |                        |          |
|                |                 |                    | Bifidobacteriaceae  | Bifidobacterium | -8.18            | 0.01     |                        |          |
|                |                 |                    |                     |                 | -7.18            | 0.03     |                        |          |
|                |                 |                    |                     |                 | -7.07            | 0.03     |                        |          |
| Bacteroidetes  | Bacteroidia     | Bacteroidales      | Unspecified         | Unspecified     | -7.88            | 0.03     |                        |          |
|                |                 |                    | Rikenellaceae       | Alistipes       | 10.40            | <0.01    |                        |          |
| Firmicutes     | Clostridia      | Clostridiales      | Lachnospiraceae     | Unspecified     | 7.17             | 0.04     |                        |          |
|                |                 |                    | Ruminococcaceae     | Unspecified     | 8.43             | 0.01     | 9.91                   | 0.01     |
|                |                 |                    |                     |                 | -7.53            | 0.03     |                        |          |
| Tenericutes    | Erysipelotrichi | Erysipelotrichales | Erysipelotrichaceae | Allobaculum     | -8.32            | 0.02     |                        |          |
|                |                 |                    |                     |                 | -8.96            | 0.01     |                        |          |
|                |                 |                    |                     |                 | -8.37            | 0.01     |                        |          |
